# Supplementary material for: The Coumarin Derivative 5′-Hydroxy Auraptene Suppresses Osteoclast Differentiation via Inhibiting MAPK and c-Fos/NFATc1 Pathways
Source: Hindawi journal article supplement (doi:10.1155/2019/9395146), 2019-12-28
Supplement: f1 [file 9395146.f1.pdf]

**Table S1. Primer sequences used for real-time RT-PCR analysis.**

| Gene name      | Primer sequence (5'-3') forward | Primer sequence (5'-3') reverse |
|----------------|---------------------------------|---------------------------------|
| <i>c-Fos</i>   | 5'-CTGGTGCAGCCCACTCTGGTC-3'     | 5'-CTTTCAGCAGATTGGCAATCTC-3'    |
| <i>NFATc1</i>  | 5'-CTCGAAAGACAGCACTGGAGCAT-3'   | 5'-CGGCTGCCTTCCGTCTCATAG-3'     |
| <i>TRAP</i>    | 5'-CTGGAGTGCACGATGCCAGCGACA-3'  | 5'-TCCGTGCTCGGCGATGGACCAGA-3'   |
| <i>Mmp9</i>    | 5'-CTGTCCAGACCAAGGGTACAGCCT-3'  | 5'-GTGGTATAGTGGGACACATAGTGG-3'  |
| <i>CtsK</i>    | 5'-CCTCTCTTGGTGTCCATACA-3'      | 5'-ATCTCTCTGTACCCCTCTGCA-3'     |
| $\beta$ -Actin | 5'-GATATCGCTGCGCTGGTCGTC-3'     | 5'-ACGCAGCTCATTGTAGAAGGTGTGG-3' |
| <i>Hprt</i>    | 5'-TCAGTCAACGGGGGACATAAA-3'     | 5'-GGGGCTGTACTGCTTAACCAG-3'     |
